# Supplementary material for: Direct control of lysosomal catabolic activity by mTORC1 through regulation of V-ATPase assembly
Source: PubMed Central journal article supplement (PMC9385660; doi:10.1038/s41467-022-32515-6), 2022-08-17
Supplement: 41467_2022_32515_MOESM1_ESM.pdf [file 41467_2022_32515_MOESM1_ESM.pdf]

## **Supplementary Information:**

### **Direct control of lysosomal catabolic activity by mTORC1 through regulation of V-ATPase assembly**

Edoardo Ratto<sup>1,2</sup>, S. Roy Chowdhury<sup>1</sup>, Nora S. Siefert<sup>1</sup>, Martin Schneider<sup>3</sup>, Marten Wittmann<sup>1</sup>,  
Dominic Helm<sup>3</sup>, Wilhelm Palm<sup>1\*</sup>

<sup>1</sup>Cell Signaling and Metabolism, German Cancer Research Center (DKFZ), Heidelberg, Germany

<sup>2</sup>Faculty of Biosciences, University of Heidelberg, Heidelberg, Germany

<sup>3</sup>MS-based Protein Analysis Unit, Genomics and Proteomics Core Facility, German Cancer Research Center (DKFZ), Heidelberg, Germany

\* To whom correspondence should be addressed: [w.palm@dkfz-heidelberg.de](mailto:w.palm@dkfz-heidelberg.de)

## Supplementary figures

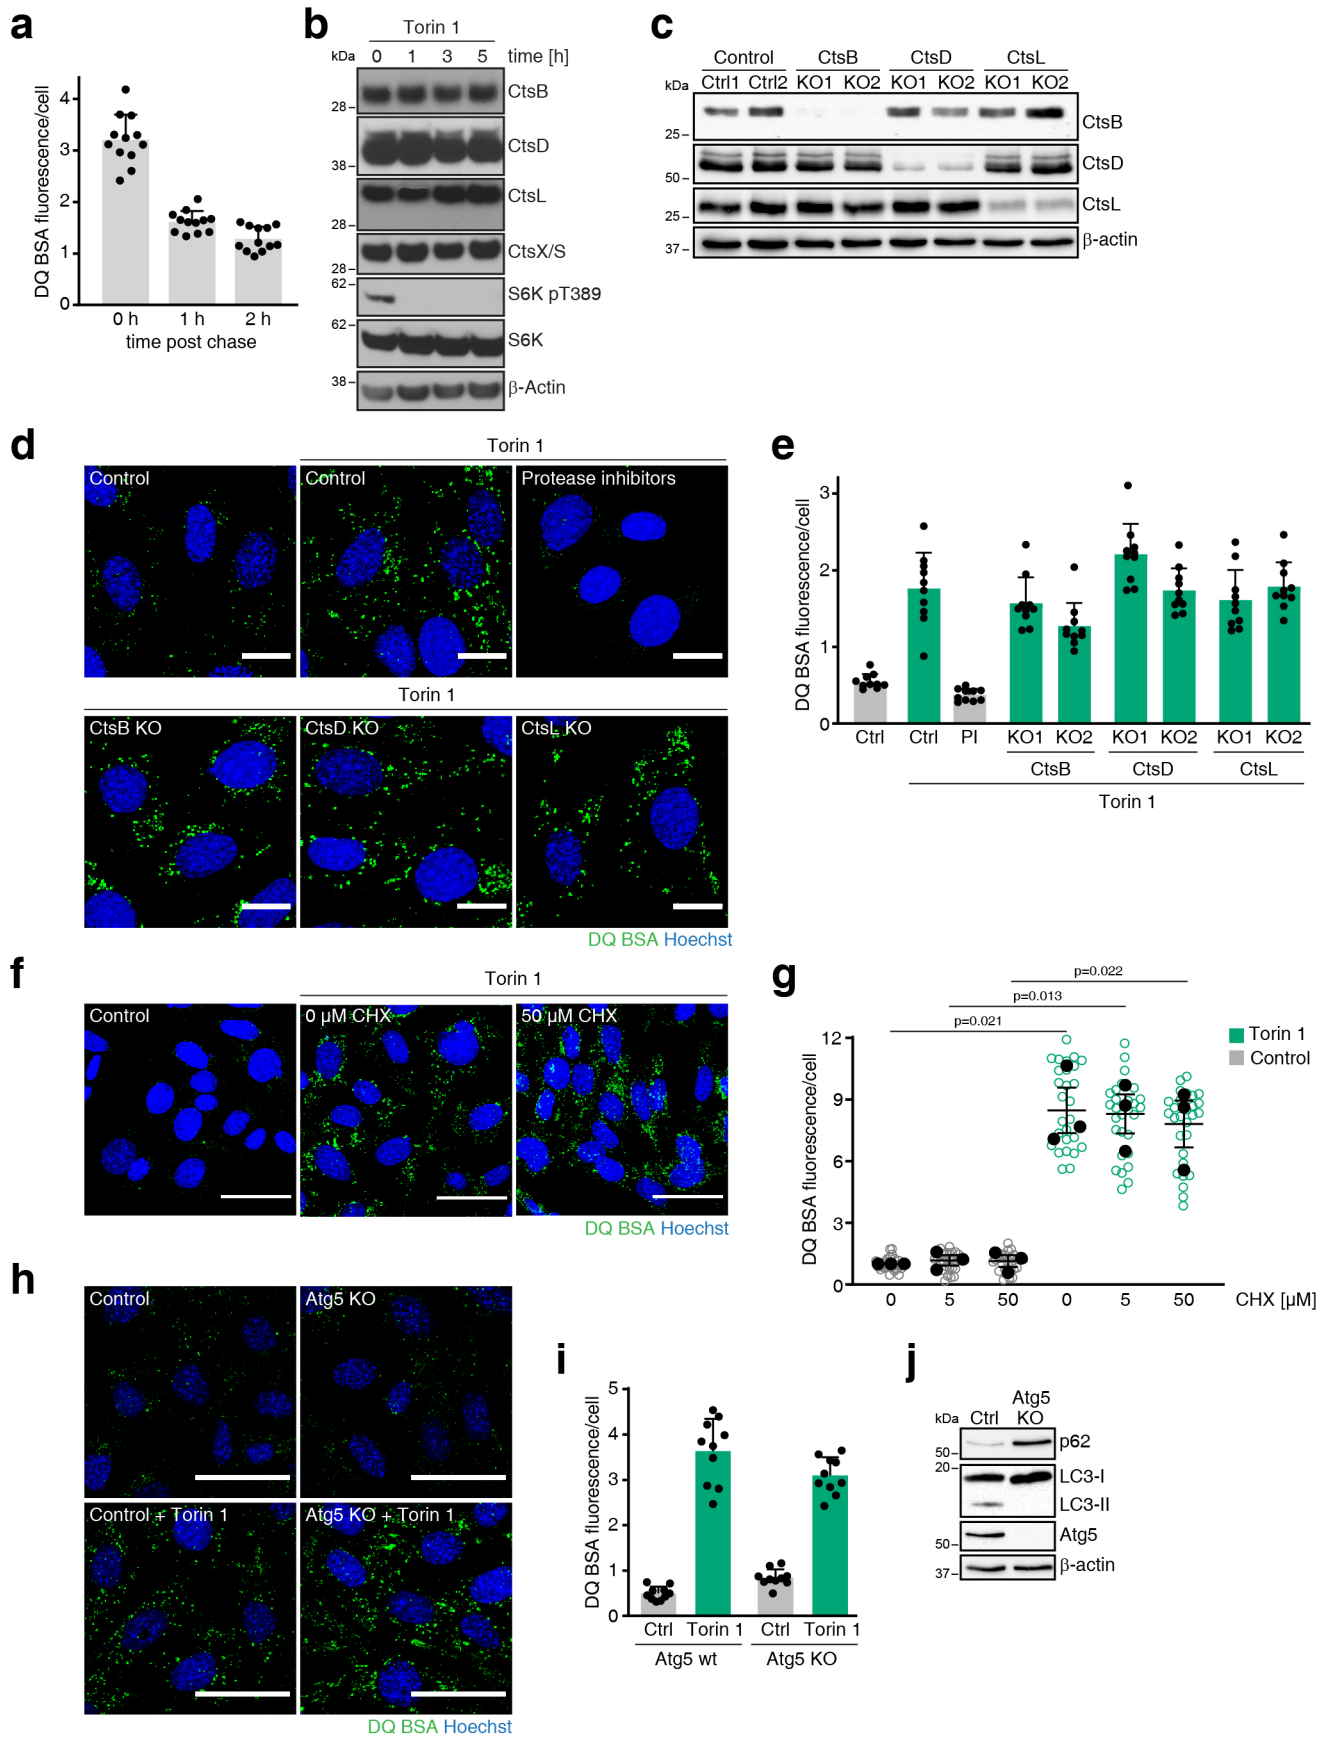

## **Supplementary Figure 1 mTORC1 does not block lysosomal catabolism of extracellular proteins through changes in cathepsin levels, protein synthesis or autophagy**

**a)** Quantification of DQ BSA degradation in MEFs after 4 h pre-loading followed by chase for indicated periods of time. Data are mean  $\pm$  SD (10 fields of view). **b)** Mature cathepsin levels in MEFs + torin 1 [250 nM] for indicated periods of time, analysed by western blot. **c)** CRISPR/Cas9-mediated deletion of cathepsin B, cathepsin D or cathepsin L, analysed by western blot. **d)** DQ BSA degradation in MEFs deficient for cathepsin B, cathepsin D or cathepsin L, or treated with protease inhibitors (PI; 20  $\mu$ M pepstatin, leupeptine, E64, AEBSF) after 5 h DQ BSA uptake + torin 1 [400 nM]. Scale bars = 20  $\mu$ m. **e)** Quantification of DQ BSA fluorescence of cells shown in d). Data are mean  $\pm$  SD (10 fields of view). **f)** DQ BSA degradation in MEFs after 5 h DQ BSA uptake  $\pm$  torin 1 [250 nM] and cycloheximide (CHX) at indicated concentrations. Scale bars = 50  $\mu$ m. **g)** Quantification of DQ BSA fluorescence of cells treated as in f). Data are normalized replicate mean  $\pm$  SEM (closed circles) and fields of view (open circles; 6-12 per replicate). **h)** DQ BSA degradation in Atg5-deficient MEFs after 5 h DQ BSA uptake  $\pm$  torin 1 [400 nM]. Scale bars = 20  $\mu$ m. **i)** Quantification of DQ BSA fluorescence of cells shown in h). Data are mean  $\pm$  SD (10 fields of view). **j)** CRISPR/Cas9-mediated deletion of Atg5, analysed by western blot. a), e), i) One representative of n=3 biologically independent experiments. b), c), j) One representative of n=2 biologically independent experiments. g) n=3 biologically independent experiments. p-values were calculated using a two-tailed unpaired t-test with Welch correction. Source data are provided as a Source Data file.

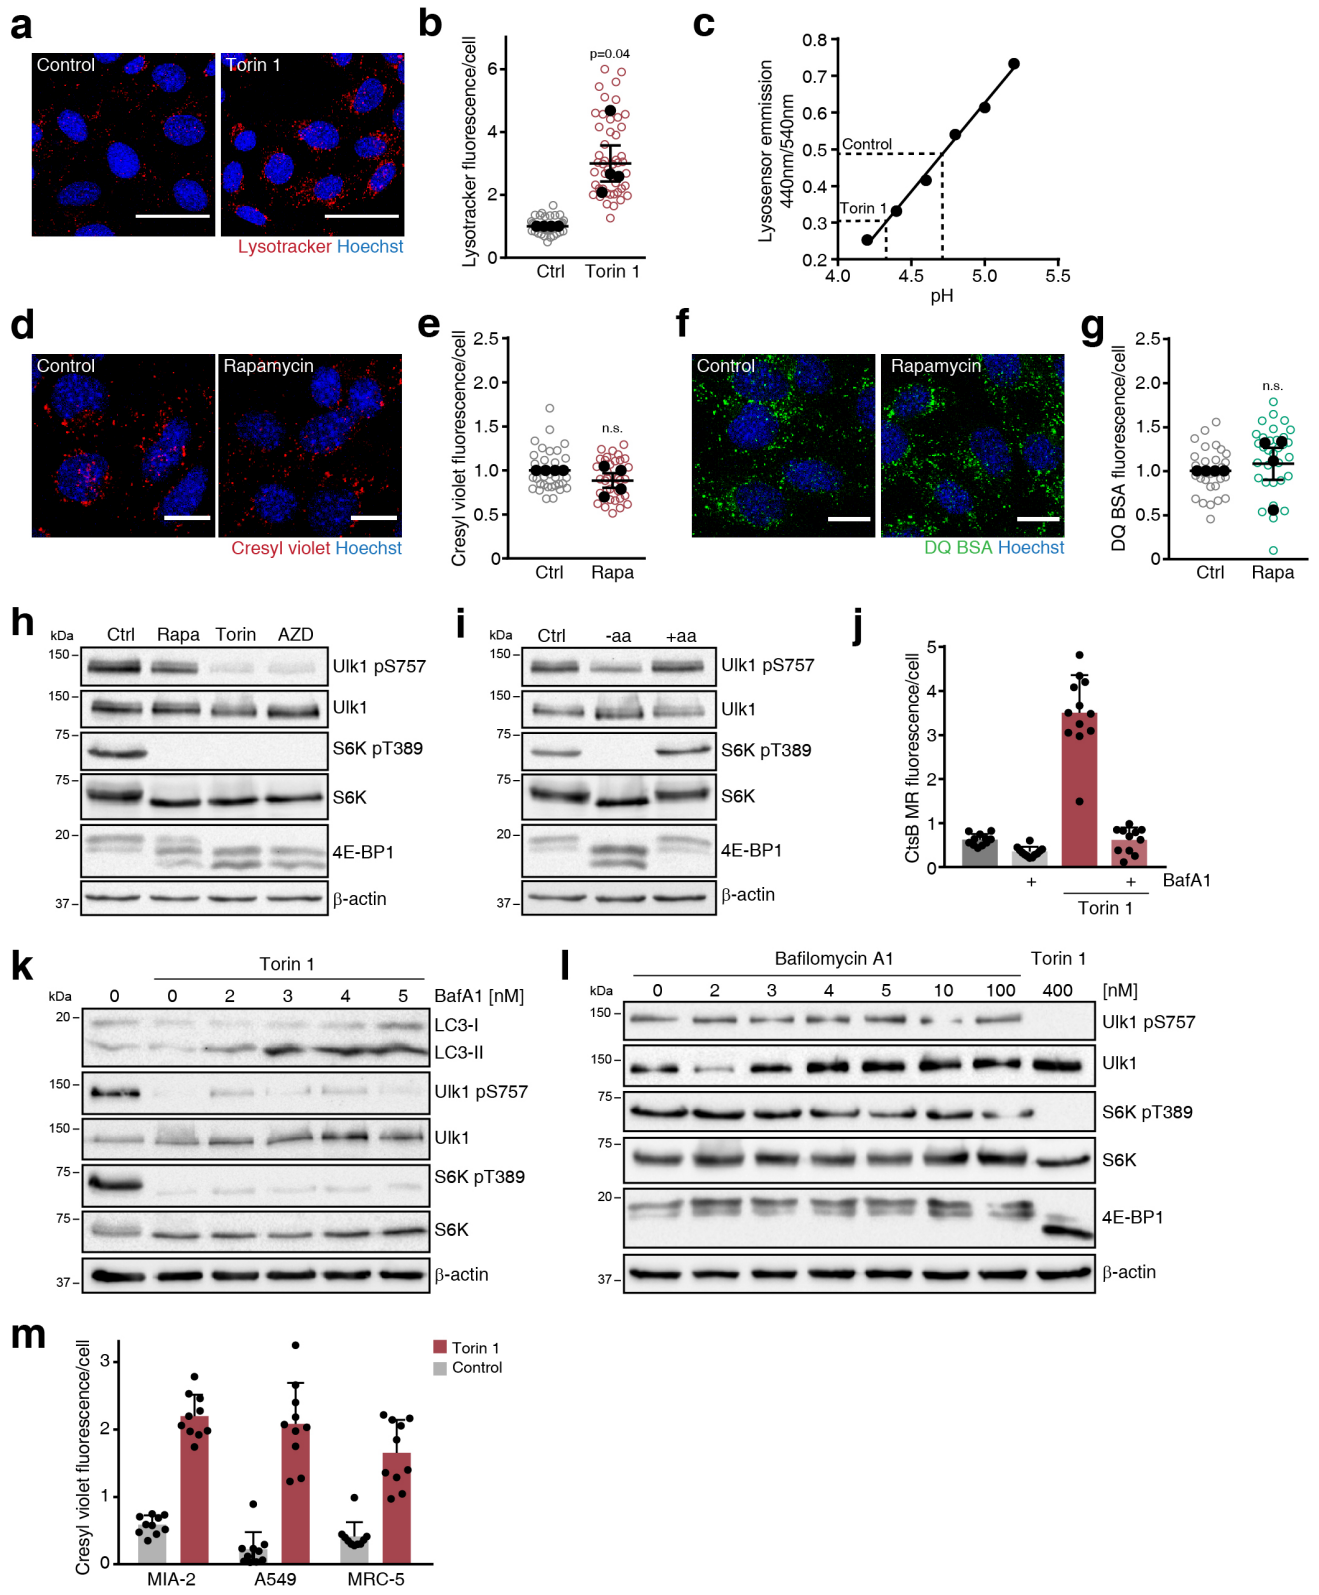



## Supplementary Figure 2 mTORC1 regulates lysosomal catabolism

**a)** LysoTracker accumulation in MEFs after 1 h  $\pm$  torin 1 [400 nM]. Scale bars = 50  $\mu$ m. **b)** Quantification of LysoTracker fluorescence in cells treated as in a). Data are normalized replicate mean  $\pm$  SEM (closed circles) and fields of view (open circles; 10-15 per replicate). **c)** Exemplary calibration curve for lysosensor-based pH measurements. Dashed lines indicate dual-emission ratiometric measurements and corresponding pH values in MEFs after 1 h  $\pm$  torin 1 [400 nM] in the same experiment. **d)** Cresyl violet accumulation in MEFs after 1 h  $\pm$  rapamycin [200 nM]. Scale bars = 20  $\mu$ m. **e)** Quantification of cresyl violet fluorescence in cells treated as in d). Data are normalized replicate mean  $\pm$  SEM (closed circles) and fields of view (open circles; 8-10 per replicate). **f)** DQ-BSA degradation in MEFs after 5 h DQ BSA uptake  $\pm$  rapamycin [200 nM]. Scale bars = 20  $\mu$ m. **g)** Quantification of DQ BSA degradation in cells treated as in f). Data are normalized replicate mean  $\pm$  SEM (closed circles) and fields of view (open circles; 6-10 per replicate). **h)** mTORC1 signalling activity in MEFs after 1 h rapamycin [100 nM], torin 1 [250 nM], or AZD8055 [250 nM] as in Fig. 2c), analysed by western blot. **i)** mTORC1 signalling activity in MEFs after 1 h amino acid starvation (-aa), or 1 h aa starvation + 30 min aa restimulation (+aa) as in Fig. 2d), analysed by western blot. **j)** Quantification of cathepsin B magic red substrate degradation in MEFs pre-treated  $\pm$  1 h torin 1 [250 nM], bafilomycin A1 [2.5 nM]. Data are mean  $\pm$  SD (10 fields of view). **k)** LC3-II levels and mTORC1 signalling activity in MEFs after 2 h + torin 1 [400 nM] and bafilomycin A1 at indicated concentrations, analysed by western blot. **l)** mTORC1 signalling activity in MEFs after 2 h + bafilomycin A1 at indicated concentrations or torin 1 [400 nM], analysed by western blot. **m)** Quantification of cresyl violet accumulation after 3 h  $\pm$  torin 1 [400 nM] in cell lines shown in Fig. 2h). Data are mean  $\pm$  SD (10 fields of view). b), e), g) n=4 biologically independent experiments. h) - m) One representative of n=3 biologically independent experiments. p-values were calculated using a two-tailed unpaired t-test with Welch correction. n.s. not significant. Source data are provided as a Source Data file.

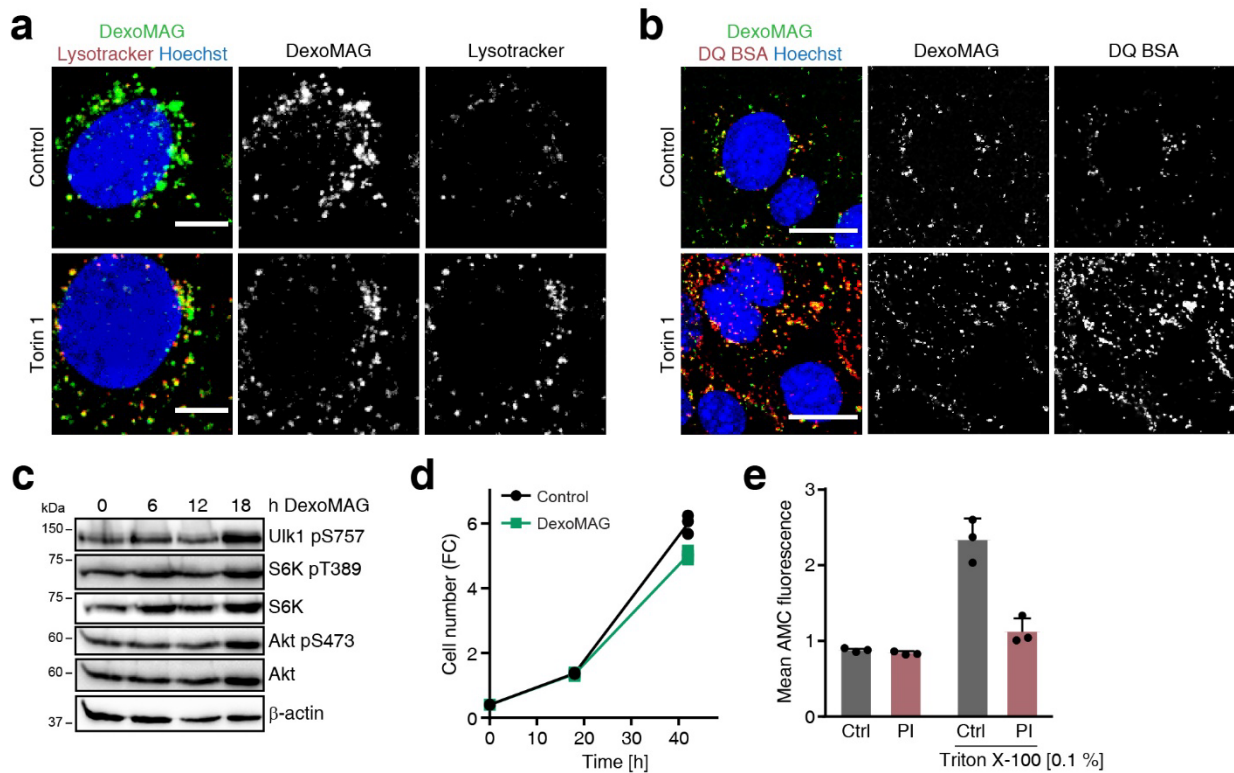

### Supplementary Figure 3 Quality controls for magnetic enrichment of lysosomes

**a)** Co-localization of fluorescent DexoMAG and lysotracker in MEFs  $\pm$  torin 1 [250 nM]. Scale bars = 10  $\mu$ m. **b)** Co-localization of fluorescent DexoMAG and DQ BSA in MEFs after 5 h  $\pm$  torin 1 [250 nM]. Scale bars = 20  $\mu$ m. **c)** mTORC1 signalling activity in MEFs after incubation with DexoMAG for indicated periods of time, analysed by western blot. **d)** Proliferation of MEFs  $\pm$  DexoMAG. Data are mean  $\pm$  SD (3 technical replicates). **e)** Integrity of magnetically enriched lysosomes, as assessed by fluorescence dequenching of the cathepsin B substrate Z-Arg-Arg-AMC. Note that cathepsin activity increases substantially upon permeabilization of lysosomes with 0.1 % Triton X-100. PI: protease inhibitor (10  $\mu$ M leupeptin). Data are mean  $\pm$  SD (3 technical replicates). a) - e) One representative of n=2 biologically independent experiments. Source data are provided as a Source Data file.

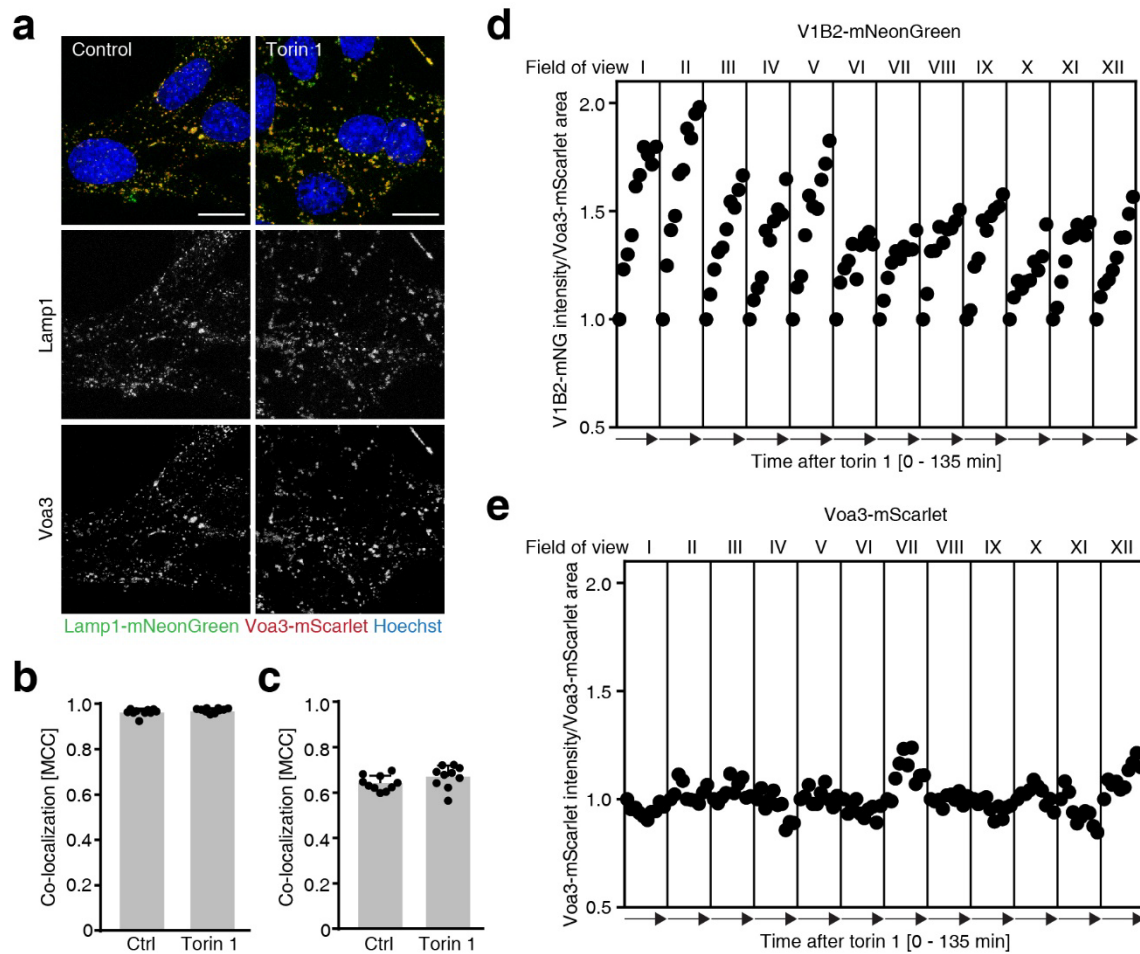

### Supplementary Figure 4 Live cell imaging reveals regulation of V-ATPase assembly at lysosomes by mTORC1

**a)** Co-localization of Voa3-mScarlet with Lamp1-mNeonGreen in MEFs after 1 h  $\pm$  torin 1 [400 nM]. Scale bars = 20  $\mu$ m. **b), c)** Manders correlation coefficient (MCC) for co-localization of b) Voa3-mScarlet with Lamp1-mNeonGreen, c) Lamp1-mNeonGreen with Voa3-mScarlet of cells shown in a). Data are mean  $\pm$  SD (10 fields of view). **d), e)** Quantification of d) V1B2-mNeonGreen levels in Voa3-mScarlet-containing organelles, e) organellar Voa3-mScarlet levels after torin 1 treatment [400 nM] over time. Data are individual fields of view in 15 min intervals. See also Fig. 4c). d), e) One representative of n=3 biologically independent experiments. Source data are provided as a Source Data file.



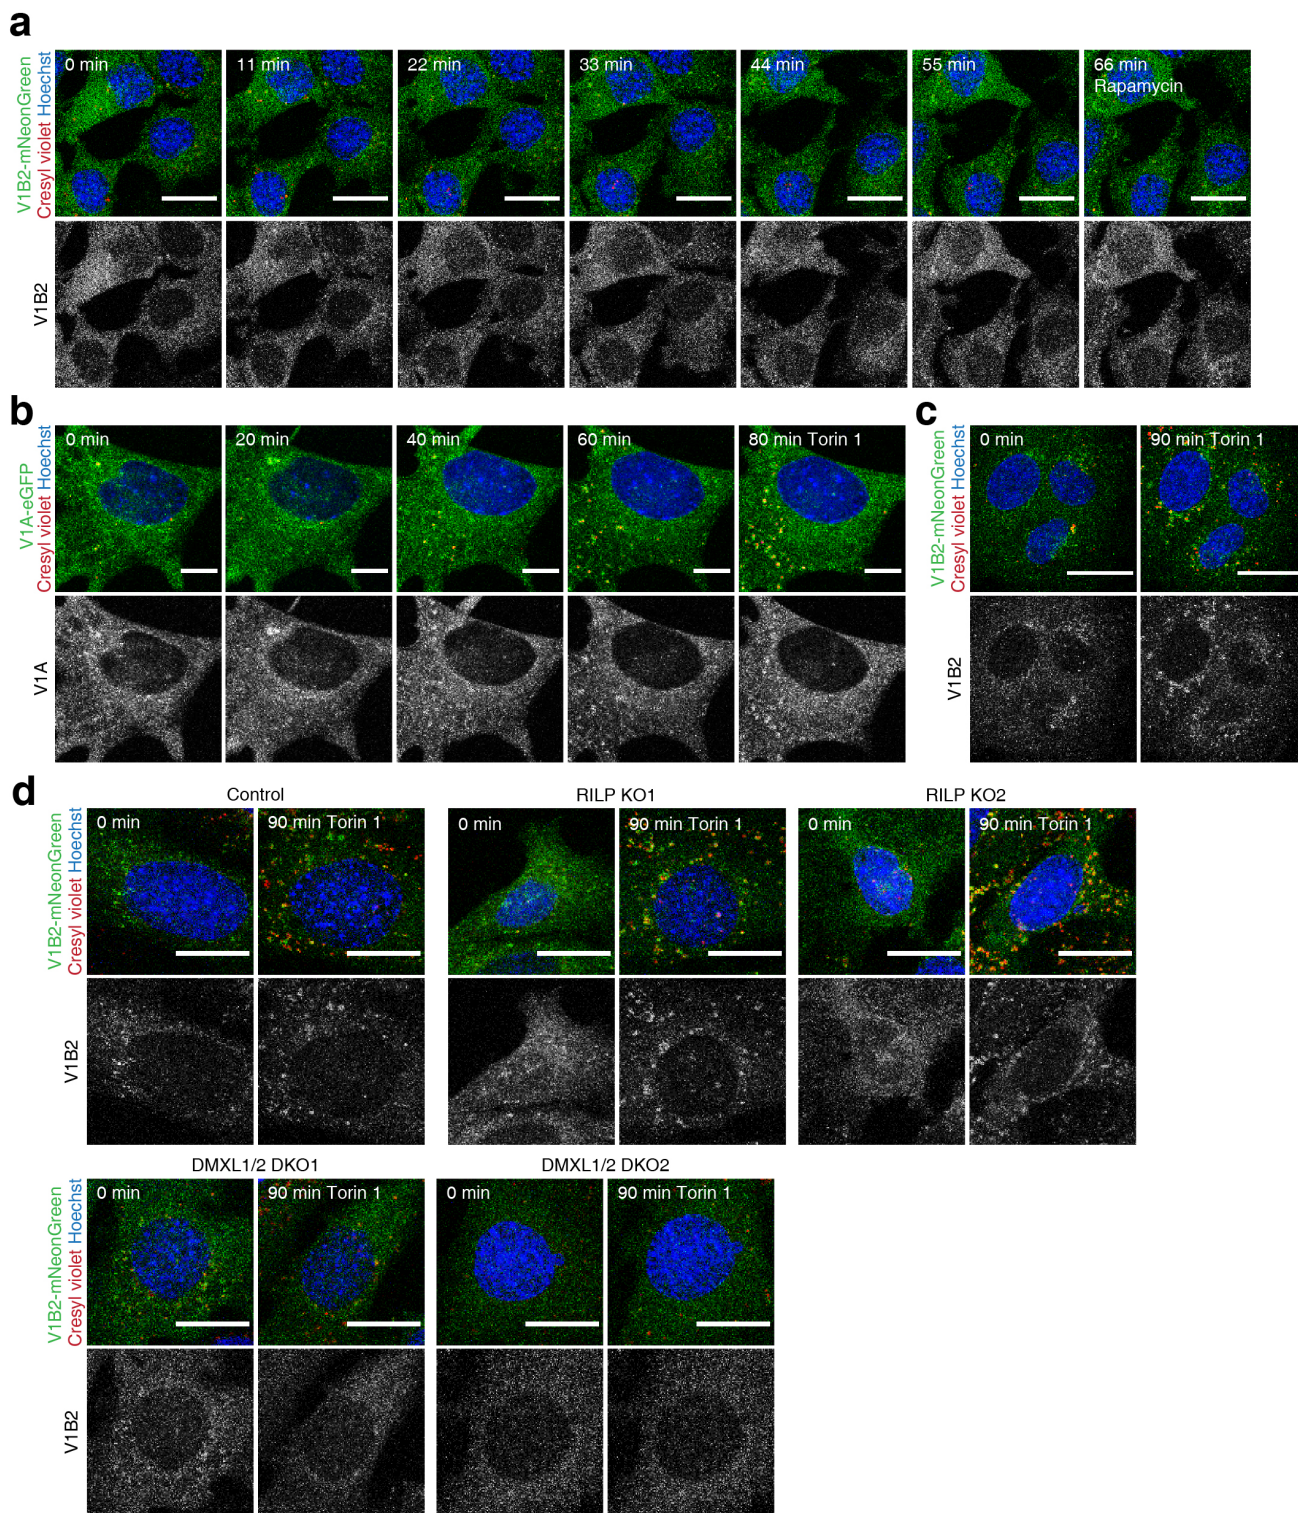

**Supplementary Figure 5 Lysosomal movement of V-ATPase V<sub>1</sub> domains and lysosomal acidification in response to mTORC1 inactivation**

**a)** No lysosomal accumulation of V1B2-mNeonGreen and cresyl violet in MEFs over time upon treatment with rapamycin [200 nM]. Scale bars = 20  $\mu$ m. **b)** Lysosomal accumulation of V1A-eGFP and cresyl violet in MEFs over time upon treatment with torin 1 [400 nM]. Scale bars = 10  $\mu$ m. **c)** Lysosomal accumulation of V1B2-mNeonGreen and cresyl violet in A549 cells before and after 90 min + torin 1 [400 nM]. Scale bars = 20  $\mu$ m. **d)** Changes in lysosomal accumulation of V1B2-mNeonGreen and cresyl violet in MEFs deficient for RILP or DMXL1/2 before and after 90 min + torin 1 [400 nM]. Scale bars = 20  $\mu$ m. a) - d) One representative of n=3 biologically independent experiments.

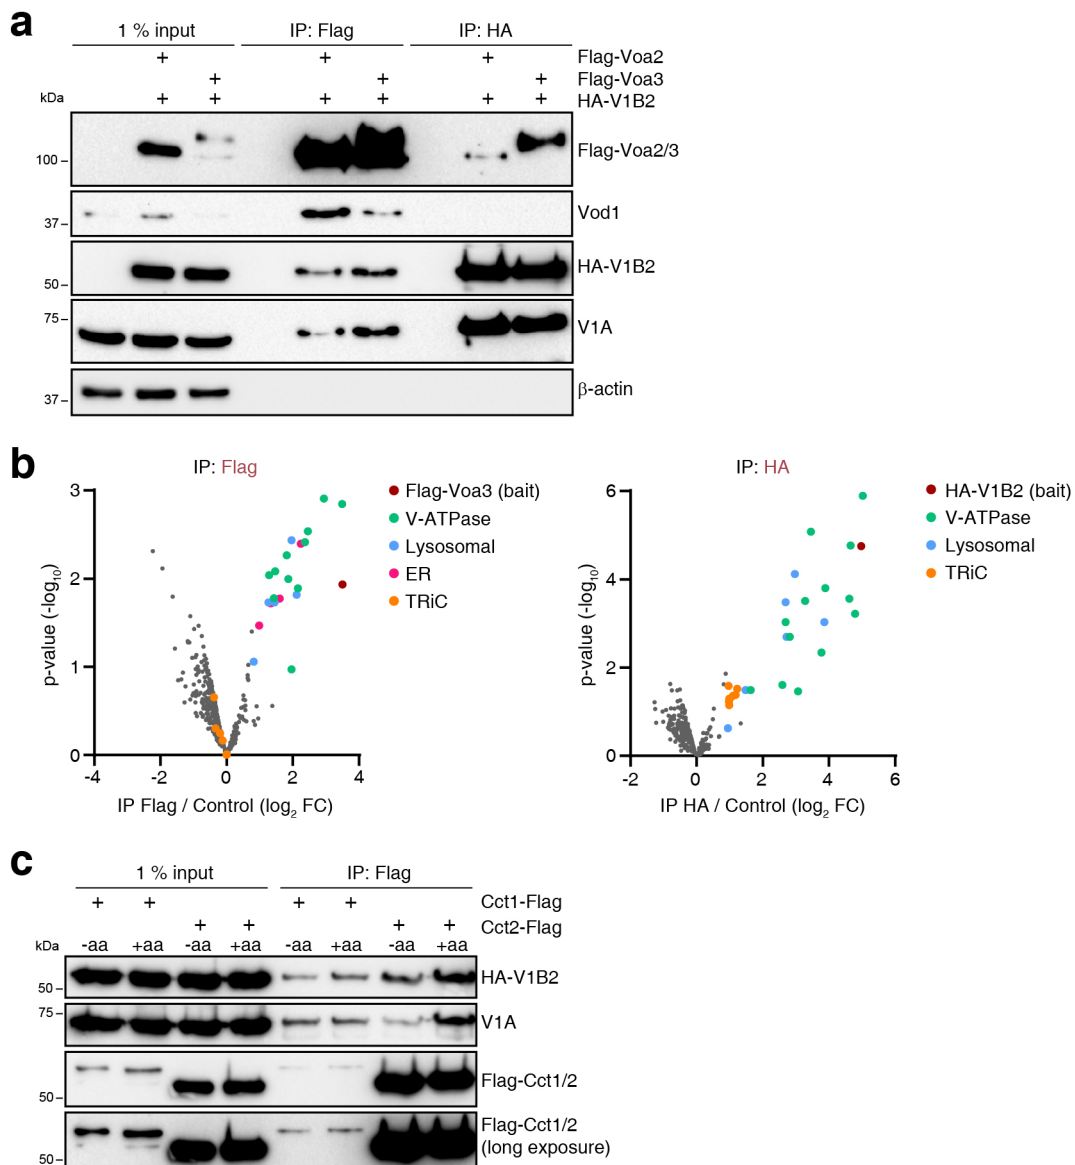

### Supplementary Figure 6 The chaperonin TRiC reversibly associates with the V-ATPase V<sub>1</sub> domain

**a)** Co-IP of V-ATPase subunits in MEFs by Flag-Voa3, Flag-Voa2 or HA-V1B2, analysed by western blot. **b)** Co-IP – SILAC proteomics of V-ATPase subcomplex-interacting proteins. Shown is the  $\log_2$  fold change of proteins from cells expressing the respective bait (Flag-Voa3 or HA-V1B2) over vector control cells. **c)** Increased Co-IP of V-ATPase V<sub>1</sub> domain subunits in MEFs with TRiC subunits Cct1 or Cct2 after 1 h amino acid starvation + 30 min amino acid restimulation (+aa) and after 1 h amino acid starvation (-aa), analysed by western blot. a) One representative of n=3 biologically independent experiments. b) n=4 biologically independent experiments. p-values were calculated using limma moderated t-statistic. c) One representative of n=2 biologically independent experiments. Source data are provided as a Source Data file.

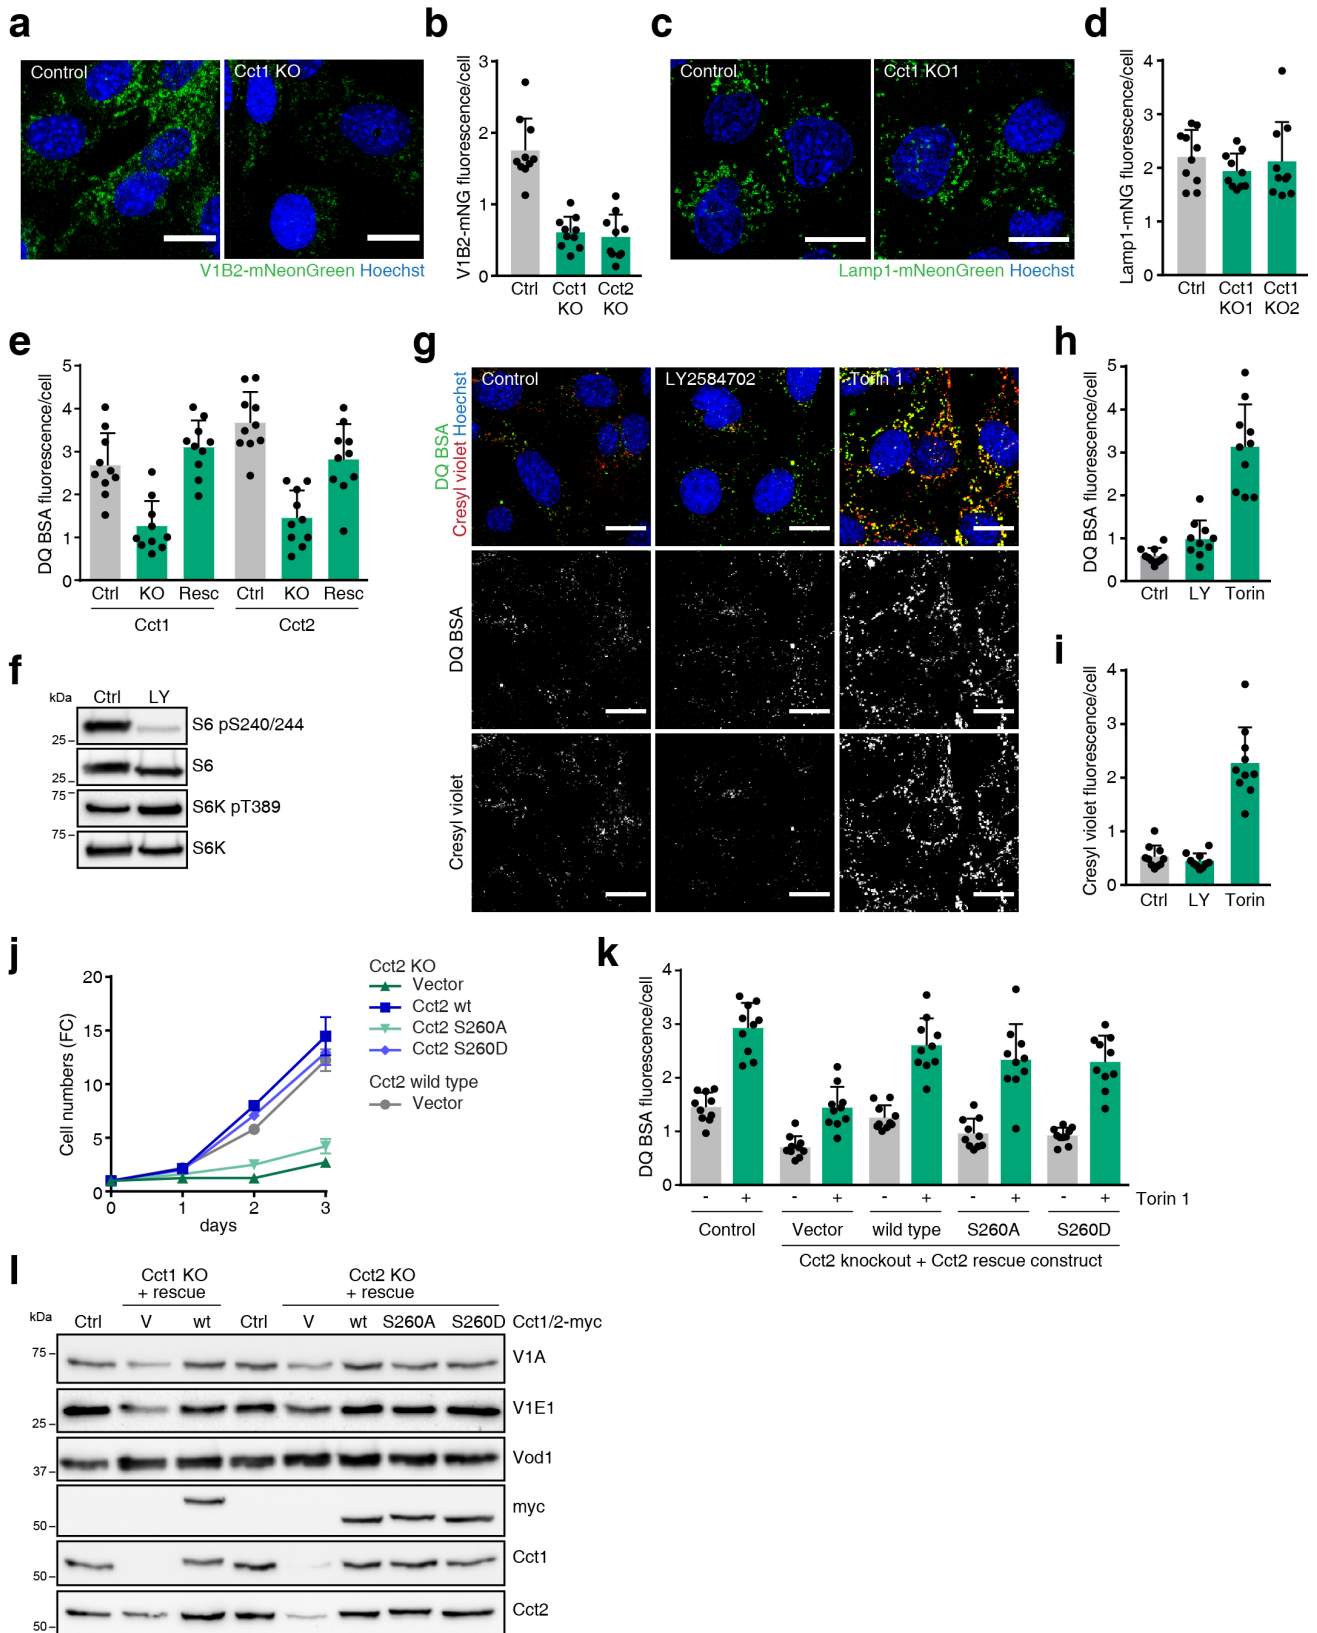



## **Supplementary Figure 7 Stabilization of the V-ATPase V<sub>1</sub> domain by TRiC is not regulated by S6K-mediated phosphorylation of Cct2**

**a)** V1B2-mNeonGreen levels in Cct1-deficient MEFs. Scale bars = 20  $\mu$ m. **b)** Quantification of V1B2-mNeonGreen levels in Cct1 and Cct2-deficient MEFs. **c)** Lamp1-mNeonGreen levels in Cct1-deficient MEFs. Scale bars = 20  $\mu$ m. **d)** Quantification of Lamp1-mNeonGreen levels in Cct1-deficient MEFs. **e)** Quantification of DQ BSA degradation in Cct1 and Cct2-deficient MEFs ectopically expressing Cct1 and Cct2 rescue construct, respectively, after 5 h DQ BSA uptake + torin 1 [400 nM]. **f)** Inhibition of S6K activity after 6 h LY2584702 [5  $\mu$ M], analysed by western blot. **g)** DQ BSA and cresyl violet in MEFs after 5 h + LY2584702 [5  $\mu$ M] or torin 1 [400 nM]. Scale bars = 20  $\mu$ m. **h), i)** Quantification of h) DQ BSA, i) cresyl violet in MEFs after 5 h DQ BSA uptake + LY2584702 [5  $\mu$ M] or torin 1 [400 nM] as shown in g). **j)** Proliferation of Cct2-deficient MEFs ectopically expressing Cct2 wild type, S260A or S260D. **k)** Quantification of DQ BSA degradation in Cct2-deficient MEFs ectopically expressing Cct2 wild type, S260A or S260D after 5 h DQ BSA uptake  $\pm$  torin 1 [400 nM]. **l)** Changes in V-ATPase subunit abundance in Cct1 and Cct2-deficient MEFs ectopically expressing Cct1 and Cct2 rescue constructs, respectively, analysed by western blot. b), d), e), h), i), k) Data are mean  $\pm$  SD (10 fields of view). j) Data are mean  $\pm$  SD (3 technical replicates). a) - i) one representative of n=3 biologically independent experiments. k), l) one representative of n=5 biologically independent experiments. Source data are provided as a Source Data file.



## Supplementary Tables

### Supplementary Table 1 sgRNA sequences

| Gene          | Species | Name           | sgRNA sequence 1     | sgRNA sequence 2     |
|---------------|---------|----------------|----------------------|----------------------|
| <b>Chr1.1</b> | mouse   | Control_sgRNA1 | GACAATGAACATAAGCACAT |                      |
| <b>Rosa1</b>  | mouse   | Control_sgRNA2 | GAAGATGGGCGGGAGTCTTC |                      |
| <b>Cct1</b>   | mouse   | CCT1_sgRNA1    | GGTGGCACCATCGTTAGTAA |                      |
| <b>Cct2</b>   | mouse   | CCT2_sgRNA1    | GGTTGGAGAGAAGCCACAA  |                      |
| <b>Atg5</b>   | mouse   | ATG5_dsgRNA    | ATCAAATAGTAAACCAAT   | GAACATCACAGTACATTTC  |
| <b>Rilp1</b>  | mouse   | RILP1_dsgRNA1  | TCTTGGAAAAGGCCCGCGTG | GCTCGTGTACCATCTAGCGG |
| <b>Rilp1</b>  | mouse   | RILP1_dsgRNA2  | GGAGGTGACAGACAGACAGC | TCTTGGAAAAGGCCCGCGTG |
| <b>Dmxl1</b>  | mouse   | DMXL1_dsgRNA1  | AGTTGGGGAAAGTACATGAG | TGATGGTGAGAGATCTAAGG |
| <b>Dmxl1</b>  | mouse   | DMXL1_dsgRNA2  | AGTAGGGAGCCATGCCACAT | GCATTAAGGACACCAAATGT |
| <b>Dmxl2</b>  | mouse   | DMXL2_dsgRNA1  | GTGGGACACAGTCAGAACAG | TATATGACAAAGGTCCAATG |
| <b>Dmxl2</b>  | mouse   | DMXL2_dsgRNA2  | GGTAAGAGATGGAATATTGG | TTGAATGCGAATCTACAGGA |
| <b>CtsB</b>   | mouse   | CTSB_dsgRNA1   | GGAGTCTACAATTCTCATGT | CTGGAGAAGGAGATACTCCC |
| <b>CtsB</b>   | mouse   | CTSB_dsgRNA2   | TCGGCCATTGGTGTGAATGC | ATTGGACAGATTAGAGACCA |
| <b>CtsD</b>   | mouse   | CTSD_dsgRNA1   | GTATCTTGCAATGAATGGAG | CCTGAGCCAGGACACTGTAT |
| <b>CtsD</b>   | mouse   | CTSD_dsgRNA2   | GGGGCAGTGCCTCTTATCCA | CACTCGAAAGGCCTACTGGC |
| <b>CtsL</b>   | mouse   | CTSL_dsgRNA1   | GCAAGAGAAAGCCCTCATGA | GGACAGATGTTCTTAAGAC  |
| <b>CtsL</b>   | mouse   | CTSL_dsgRNA2   | AAGAGTGGAGGAGAGCGATA | CCAAGCAGAGGACAGCCAAA |
| <b>Cct1</b>   | mouse   | CCT1_dsgRNA1   | AGTTGGCTTGGATAAAATGT | GTTCGGGGACCGCAGCACTG |
| <b>Cct1</b>   | mouse   | CCT1_dsgRNA2   | GTTCGGGGACCGCAGCACTG | CAGATCATCAATCCGAAGGA |
| <b>Cct2</b>   | mouse   | CCT2_dsgRNA1   | AGTGGCACCACGAAGCACAA | GATCCTAGAACAGTTTACGG |

### Supplementary Table 2 PCR primers for endogenous tagging of Lamp1

| Primer ID        | Sequence (5' to 3')                                                                                                                |
|------------------|------------------------------------------------------------------------------------------------------------------------------------|
| <b>M1_mLAMP1</b> | G*T*G*G*G*CGGTGCCCTGGCAGGGCTGGTCCTCATCGTCCTCATTGCCTACCTCATTGGC<br>AGGAAGAGGAGTCACGCCGGCTATCAGACCATCTCAGGTGGAGGAGGTAGTG             |
| <b>M2_mLAMP1</b> | G*C*T*T*G*GGGATGTGAGAACAGGCCCTGTGCATCTCTGGTGCACCTGCCACCAGGAA<br>AAAACCCACCAGGCTAGATGGTCTATCTACAAGAGTAGAAATTAGCTAGCTGCATCGGTA<br>CC |
